# Supplementary material for: Transcriptome and Hormone Comparison of Three Cytoplasmic Male Sterile Systems in Brassica napus
Source: PubMed Central journal article supplement (PMC6321506; doi:10.3390/ijms19124022), 2018-12-12
Supplement: ijms-19-04022-s001.pdf [file ijms-19-04022-s001.pdf]

**Table S1. Primer sequences for RT-PCR.**

| Gene-name     | Primer-name | Primer sequence             | Annotation                                                |
|---------------|-------------|-----------------------------|-----------------------------------------------------------|
| BnUnng1000260 | 1-F         | ATGAGCTTCTCTTACAATCCTA      | NAC transcription factor 56-like                          |
|               | 1-R         | TGAGACGGTACTCATGCATGAT      |                                                           |
| BnA09g0350100 | 2-F         | TCGGTTTCATCCGACCGACGA       | PREDICTED: NAC transcription factor 25                    |
|               | 2-R         | TAGTGAGTTTTTCCTTGACGT       |                                                           |
| BnA01g0035970 | 3-F         | TCATCCAACCGATGAAGAGCT       | PREDICTED: NAC transcription factor 56-like               |
|               | 3-R         | TTCTGTTGCCGTAATCACAT        |                                                           |
| BnC07g0816730 | 4-F         | AGGTTCCTTGACATCAGCTTCTC     | PREDICTED: NAC domain-containing protein 100              |
|               | 4-R         | AATGTTCTTGACCAAGAATGGG      |                                                           |
| BnA02g0071160 | 5-F         | TTACGTAACGTTTCGTCGTATT      | PREDICTED: bZIP transcription factor 44-like              |
|               | 5-R         | CAGAGTATCACATCATTATAT       |                                                           |
| BnC03g0540620 | 6-F         | CAGATCAAAGATGTCTAGA         | PREDICTED: protein TIFY 9-like isoform X1                 |
|               | 6-R         | AGTCCCAATCAACAAAGAG         |                                                           |
| BnC01g0467060 | 7-F         | GCAACAAGCAAAAAGGTGAA        | PREDICTED: transcription factor MYB26-like isoform X1     |
|               | 7-R         | TTGTGTTGGTAGTGGTTAGA        |                                                           |
| BnC01g0439330 | 8-F         | ACGTCAAAATGGAGAGTTCA        | PREDICTED: probable WRKY transcription factor 31          |
|               | 8-R         | TTCTGTTCCGTTGTTGTTG         |                                                           |
| BnA06g0242820 | 9-F         | TGGTCAAAATCATCCTAACCTT      | PREDICTED: LOB domain-containing protein 27               |
|               | 9-R         | TCTCAATCAATTCACACTCGTG      |                                                           |
| BnA01g0035930 | 10-F        | GTGTACCTTACTTGAGGAAGAT      | PREDICTED: auxin-responsive protein IAA19-like isoform X1 |
|               | 10-R        | GTCTTCGTATATGGTAACGTAT      |                                                           |
| BnUnng1000190 | 11-F        | GCCGCCGGTTTGCTTTACCGG       | PREDICTED: auxin-responsive protein IAA19-like isoform X1 |
|               | 11-R        | GTCTTCGTATATGGTAACGTAT      |                                                           |
| BnA08g0306020 | 12-F        | GTAGCCGGATTCCGTCGTAGCT      | PREDICTED: abscisic acid 8&apos;-hydroxylase 3            |
|               | 12-R        | TCTCCGAGTATTGAGATTAACG      |                                                           |
| BnC09g0904760 | 13-F        | TAGGCGAAACGTTCCAGCTTTA      | PREDICTED: abscisic acid 8&apos;-hydroxylase 3-like       |
|               | 13-R        | GATACTCTGTTTTAGACTGAG       |                                                           |
| Actin         | A-F         | TCTGGCATCACACTTTCTACAACGAGC | Internal reference for quantification of gene expression  |
|               | A-R         | CAGGGAACATGGTCAACCACC       |                                                           |
